# Supplementary material
Source: publisher site journal article supplement (https://www.dovepress.com/article/375675)
Supplement: Supplementary file 1 [file get_supplementary_file.php]

**Interview guide**

The final interview outline was as follows: What attracted you to join the Internet-based CenteringPregnancy health management model? How does the experience differ from your expectations? What were your feelings on the Internet-based CenteringPregnancy health management model? What was the effect of the Internet-based CenteringPregnancy health management model on your health? What do you think are the advantages and disadvantages of the Internet-based CenteringPregnancy health management model? What were your comments and suggestions on the Internet-based CenteringPregnancy health management model?
